# Supplementary material for: 3-(1,2,3-Triazol-4-yl)-β-Carbolines and 3-(1H-Tetrazol-5-yl)-β-Carbolines: Synthesis and Evaluation as Anticancer Agents
Source: MDPI journal article supplement (doi:10.3390/ph15121510), 2022-12-03
Supplement: s1 [file s1]

# **3-(1,2,3-Triazol-4-yl)- $\beta$ -Carbolines and 3-(1*H*-Tetrazol-5-yl)- $\beta$ -Carbolines: Synthesis and Evaluation as Anticancer Agents**

João L. P. Ribeiro,<sup>1</sup> Joana B. Loureiro,<sup>2</sup> Susana M. M. Lopes,<sup>1</sup> Lucília Saraiva,<sup>2</sup> Teresa  
M. V. D. Pinho e Melo<sup>1\*</sup>

<sup>1</sup>University of Coimbra, Coimbra Chemistry Centre-Institute of Molecular Sciences, and Department of  
Chemistry, 3004-535 Coimbra

<sup>2</sup>LAQV/REQUIMTE, Laboratory of Microbiology, Department of Biological Sciences, Faculty of  
Pharmacy, University of Porto, Rua Jorge Viterbo Ferreira, 228, 4050-313 Porto, Portugal

## **Supporting Information**

### **Table of Contents**

|                                                                          |   |
|--------------------------------------------------------------------------|---|
| <sup>1</sup> H and <sup>13</sup> C NMR spectra of all new compounds..... | 2 |
|--------------------------------------------------------------------------|---|

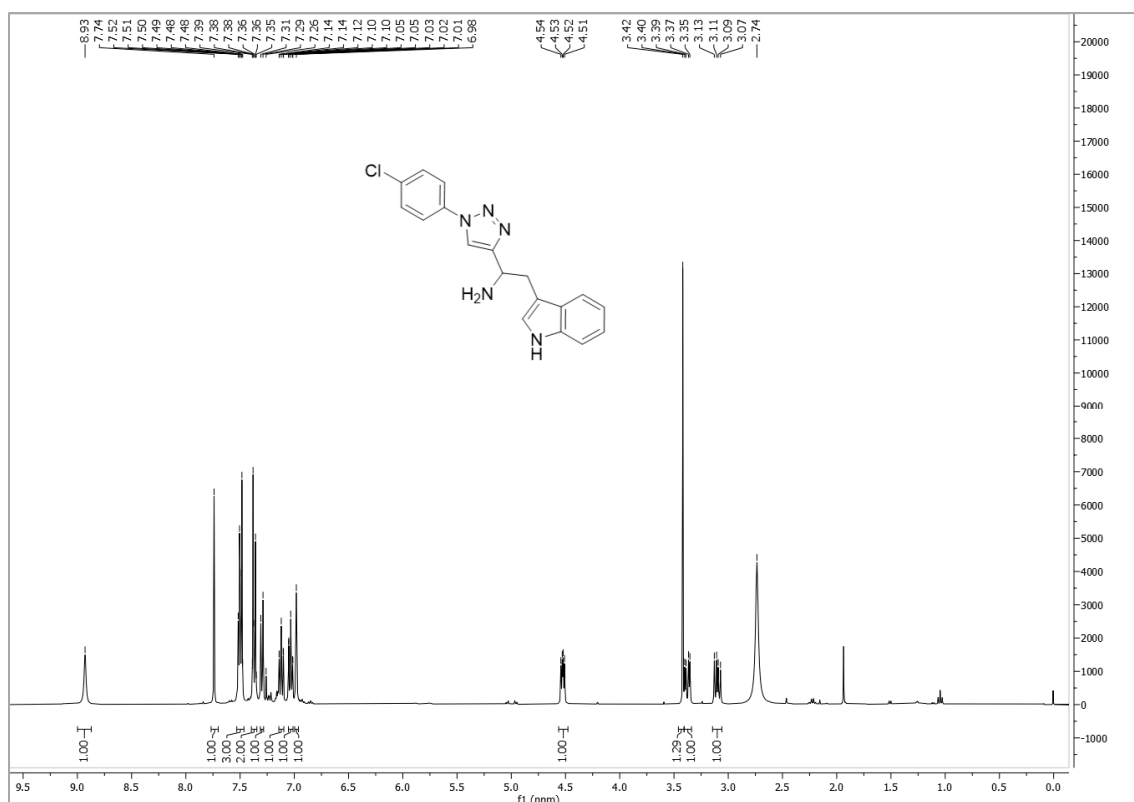

**Figure S1.** <sup>1</sup>H NMR spectrum of amine **11** (400 MHz, CDCl<sub>3</sub>).

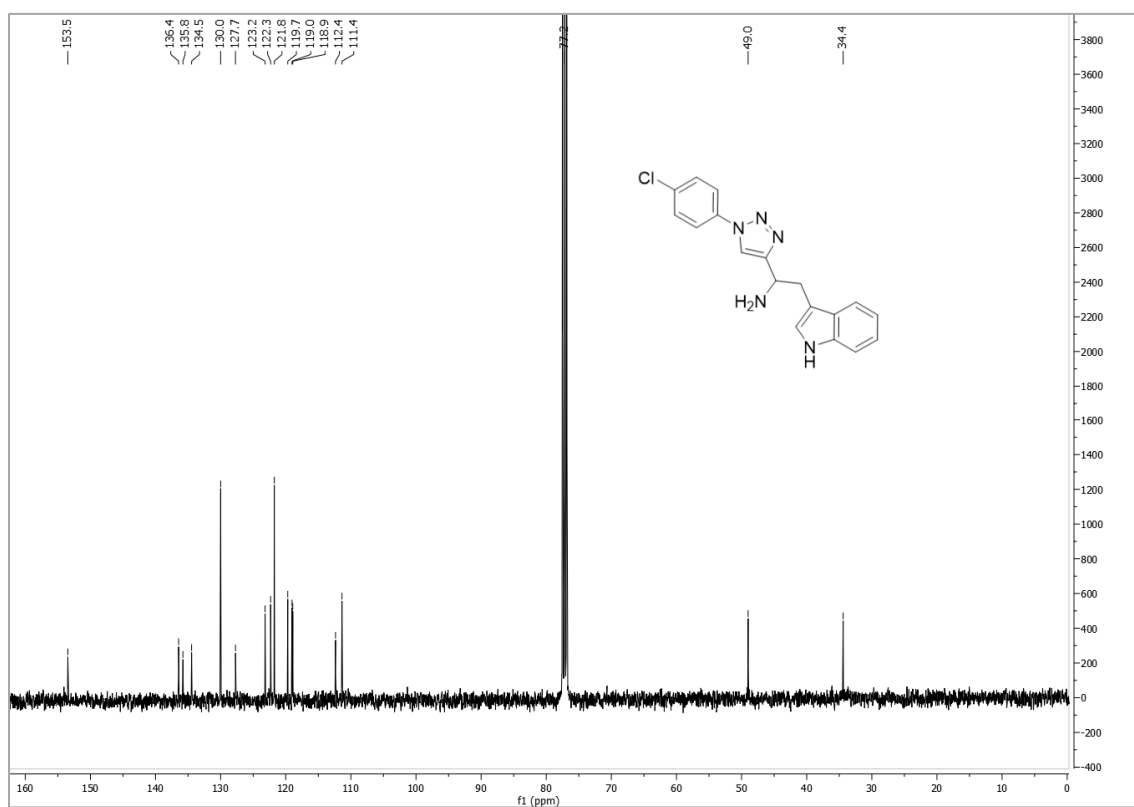

**Figure S2.** <sup>13</sup>C NMR spectrum of amine **11** (100 MHz, CDCl<sub>3</sub>).

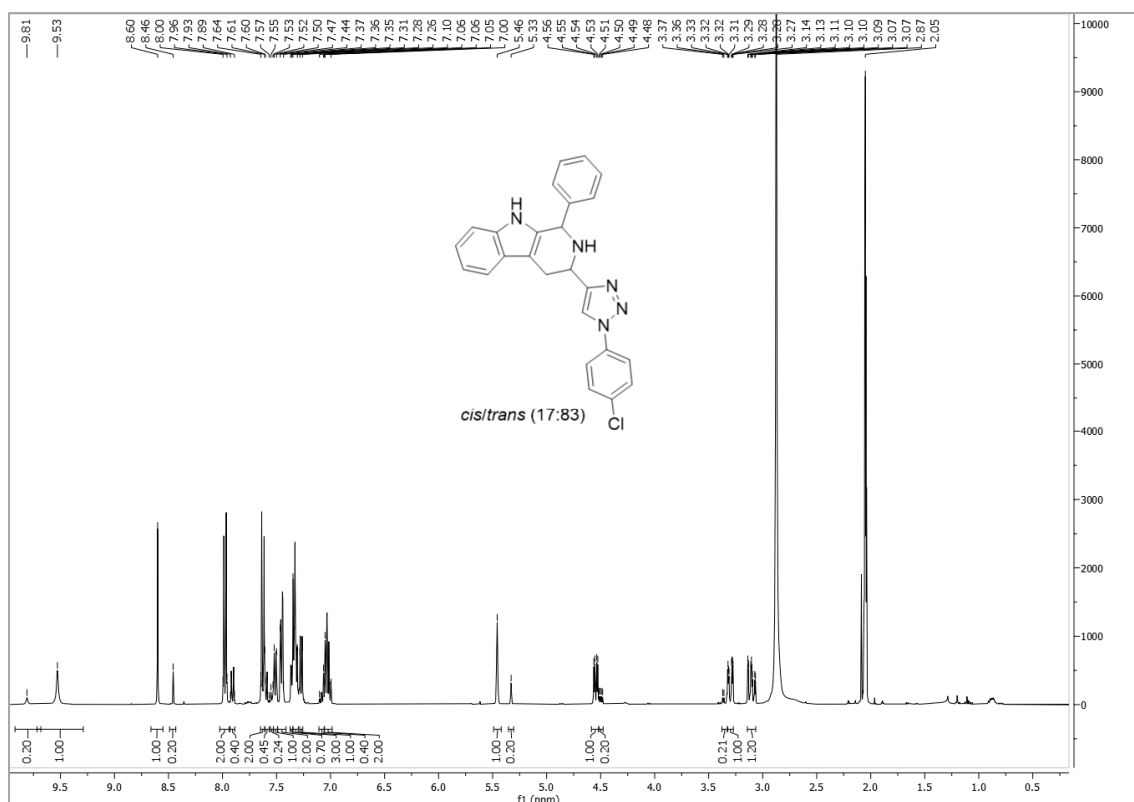

**Figure S3.**  $^1\text{H}$  NMR spectrum of compounds **12a** (400 MHz, Acetone- $d_6$ ).

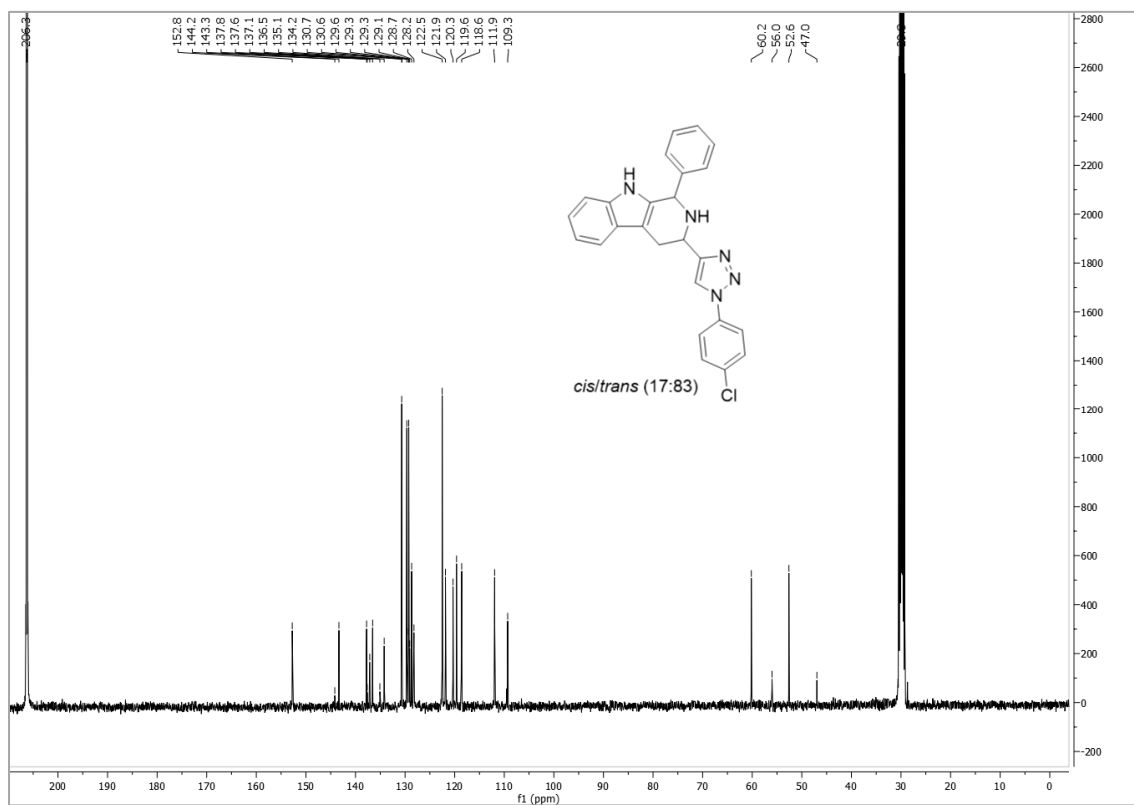

**Figure S4.**  $^{13}\text{C}$  NMR spectrum of compounds **12a** (100 MHz, Acetone- $d_6$ ).

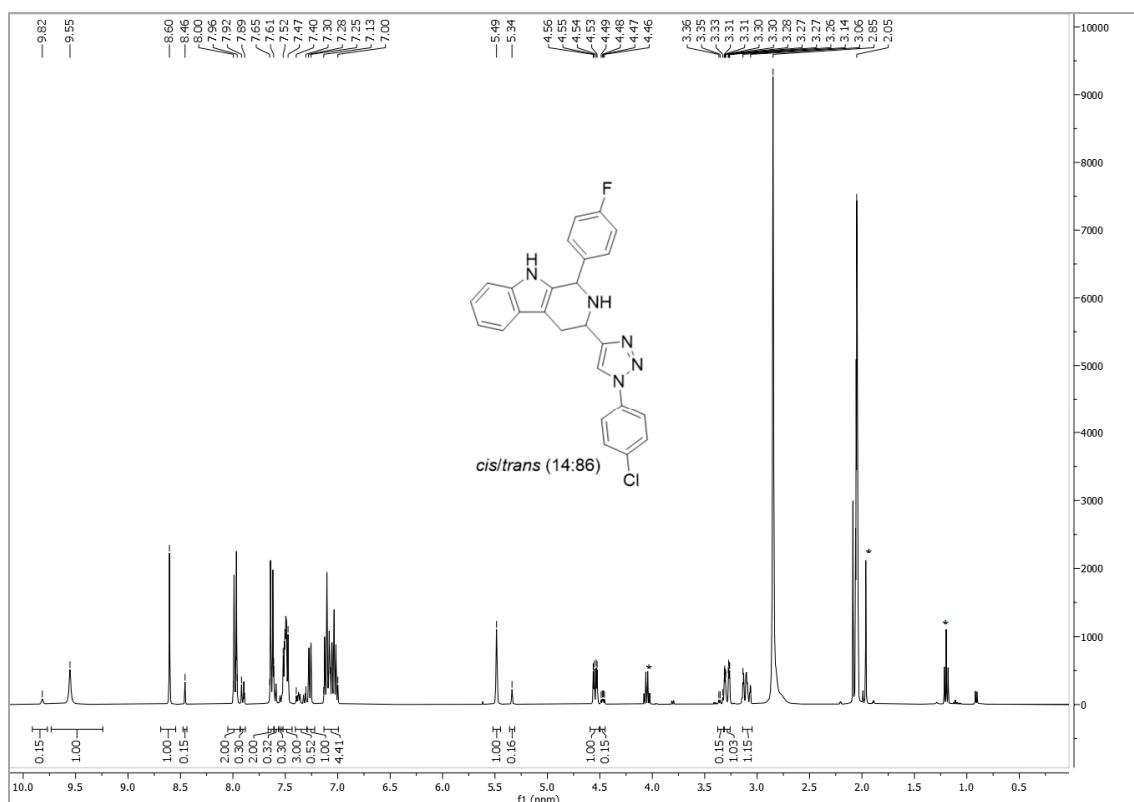

**Figure S5.** <sup>1</sup>H NMR spectrum of compounds **12b** (400 MHz, Acetone-*d*<sub>6</sub>). \*Solvent (EtOAc).

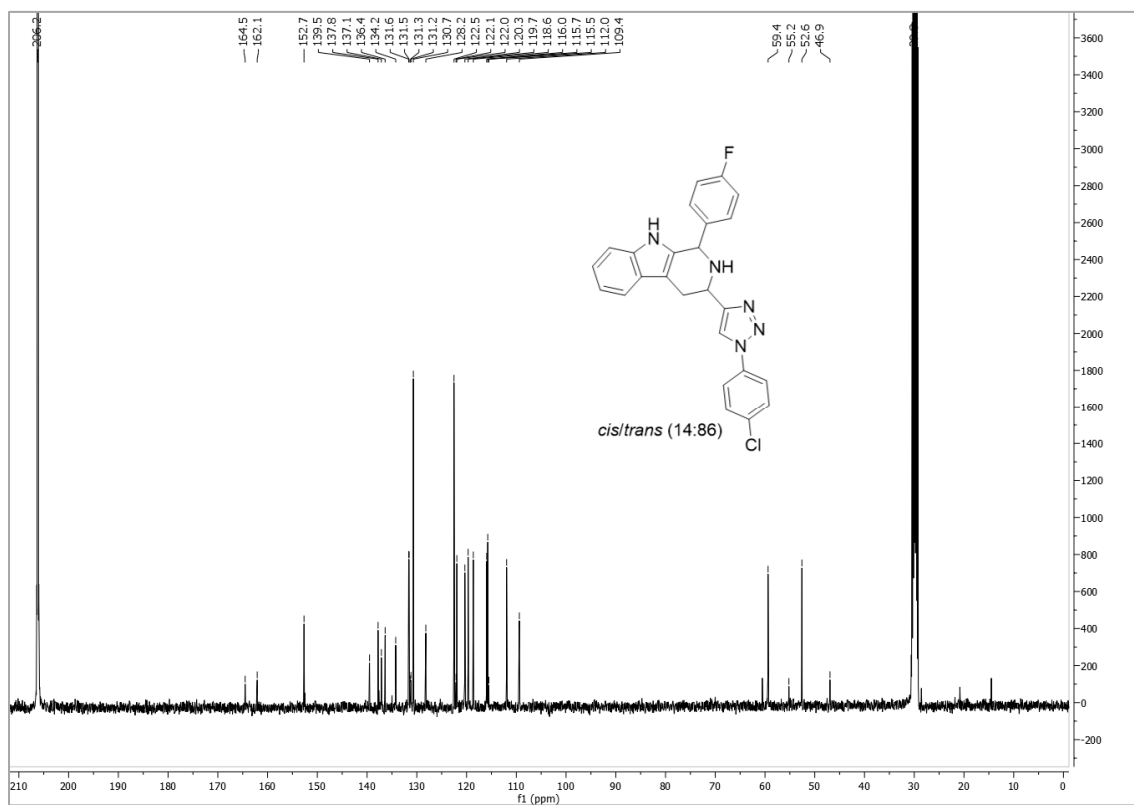

**Figure S6.** <sup>13</sup>C NMR spectrum of compounds **12b** (100 MHz, Acetone-*d*<sub>6</sub>).

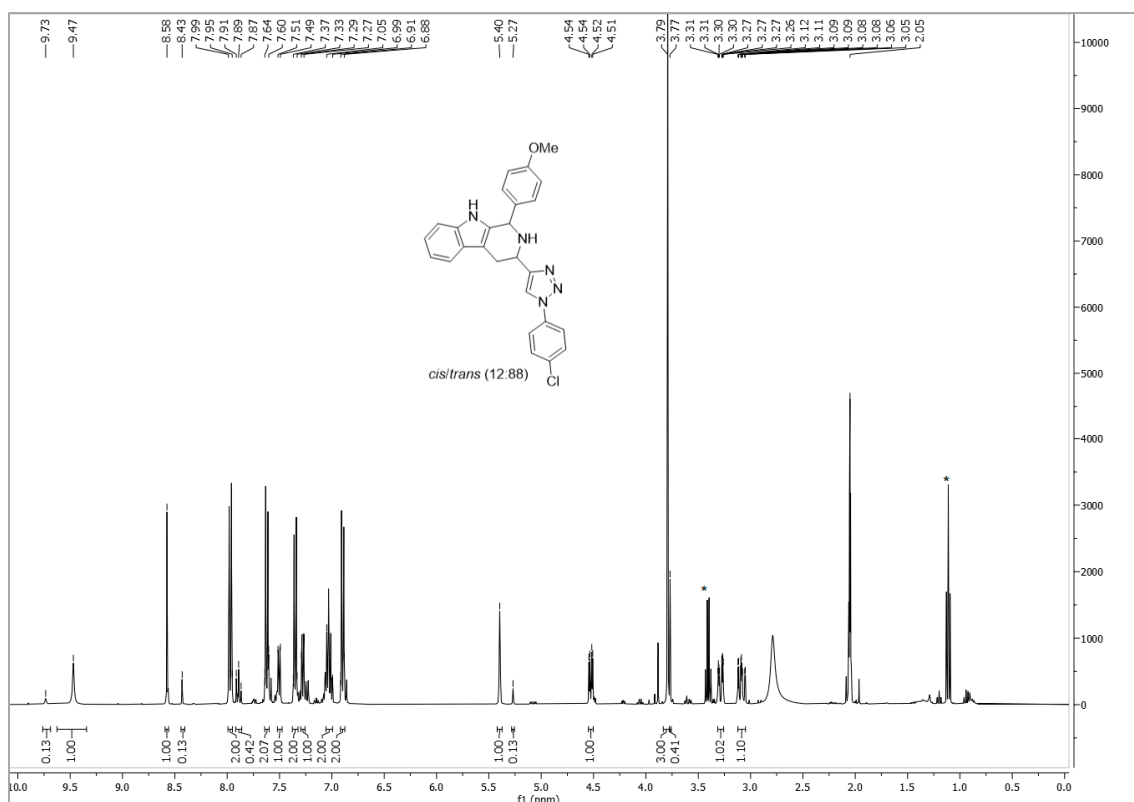

**Figure S7.** <sup>1</sup>H NMR spectrum of compounds **12c** (400 MHz, Acetone-*d*<sub>6</sub>). \*Solvent (Et<sub>2</sub>O).

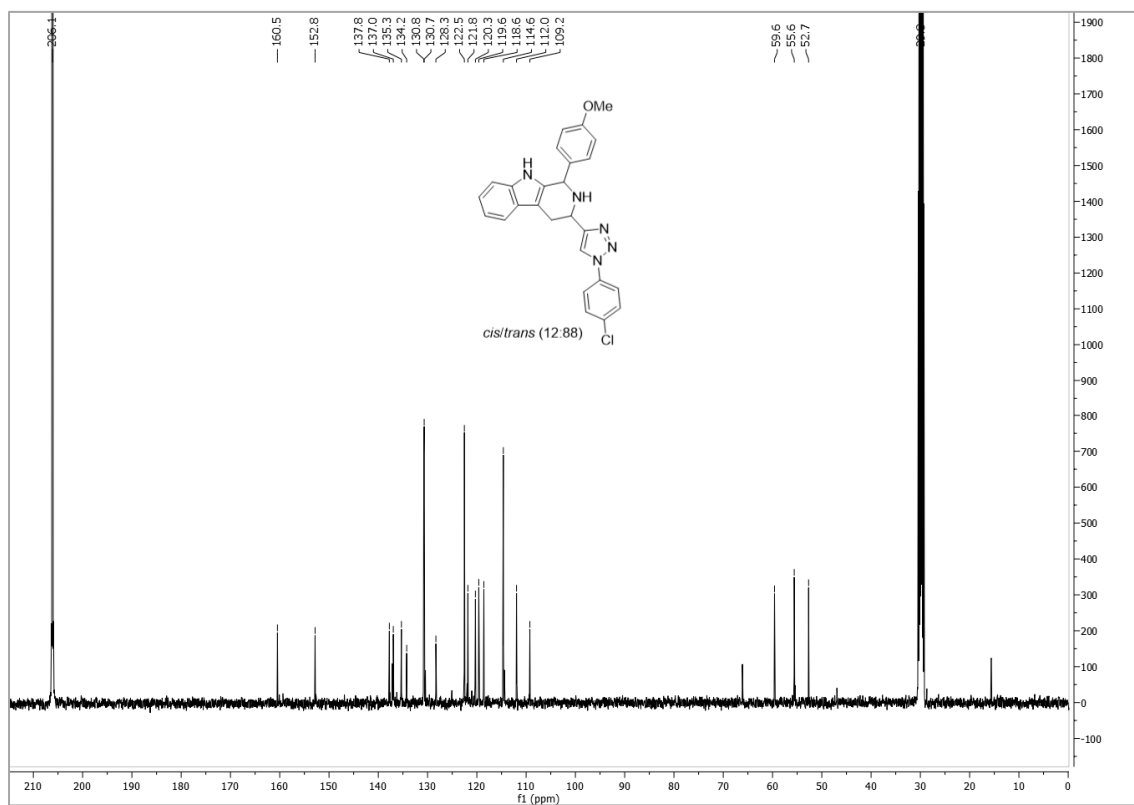

**Figure S8.** <sup>13</sup>C NMR spectrum of compounds **12c** (100 MHz, Acetone-*d*<sub>6</sub>).

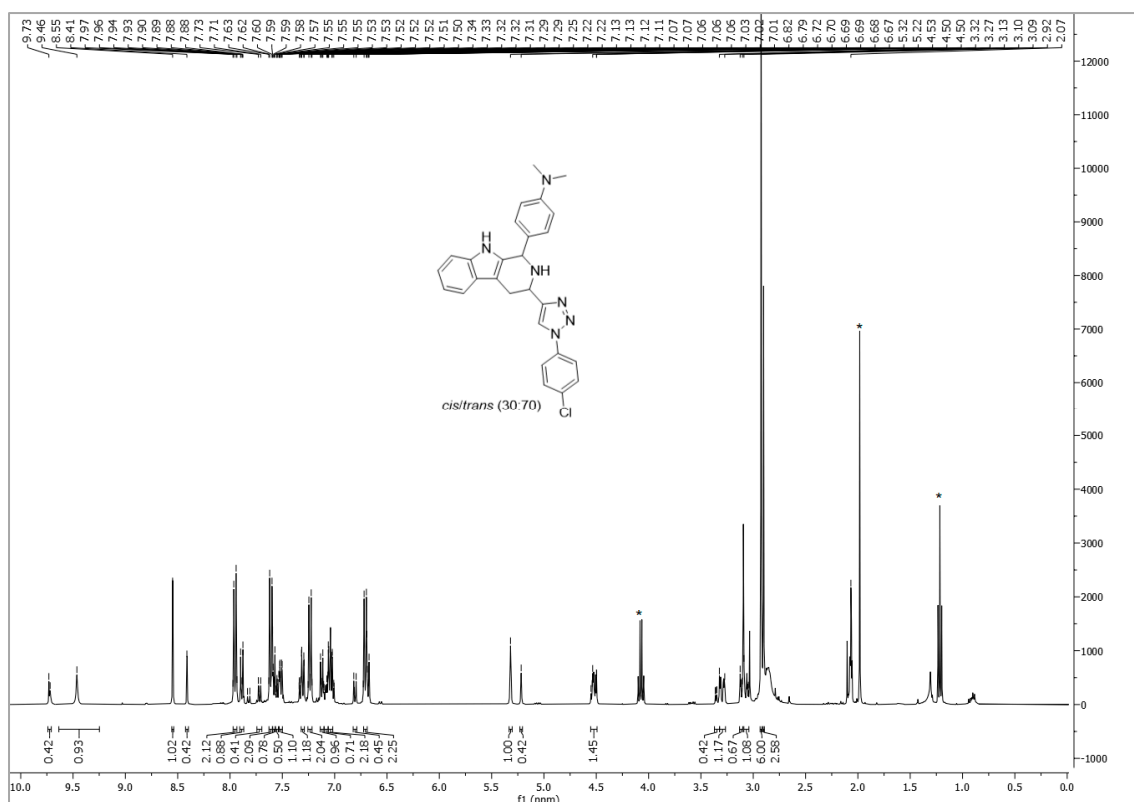

**Figure S9.** <sup>1</sup>H NMR spectrum of compounds **12d** (400 MHz, Acetone-*d*<sub>6</sub>). \*Solvent (EtOAc).

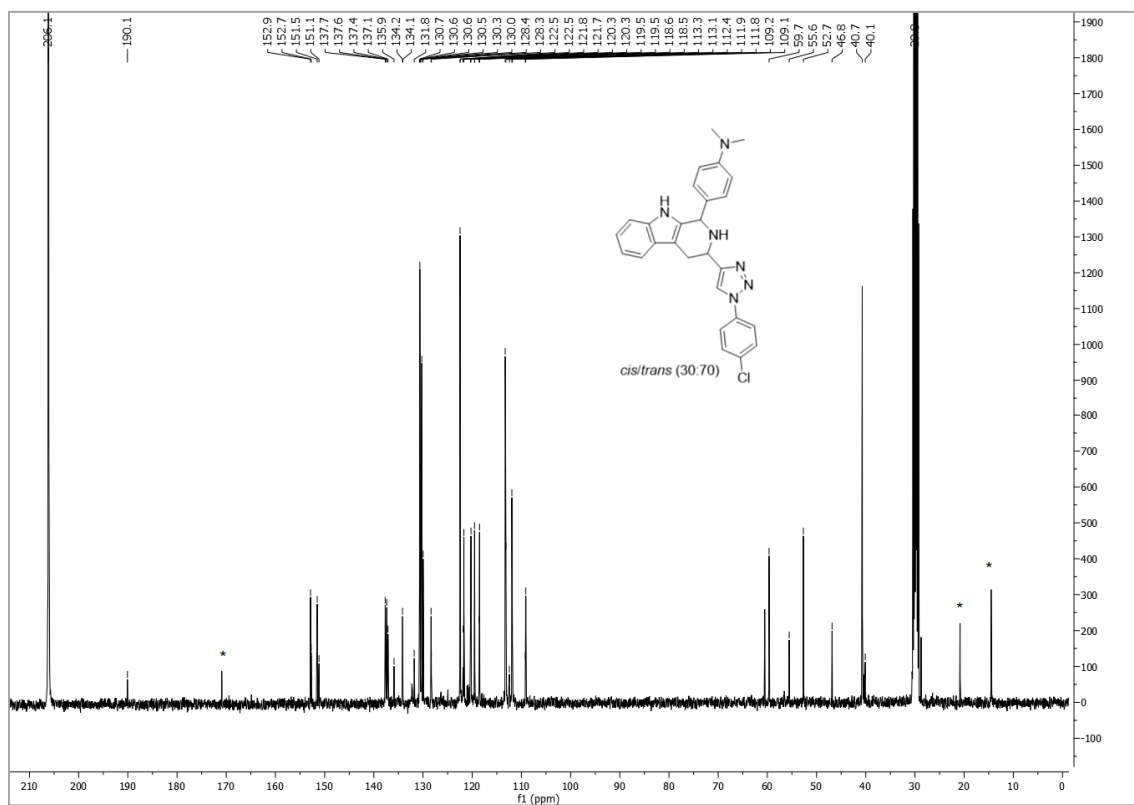

**Figure S10.** <sup>13</sup>C NMR spectrum of compounds **12d** (100 MHz, Acetone-*d*<sub>6</sub>). \*Solvent (EtOAc).

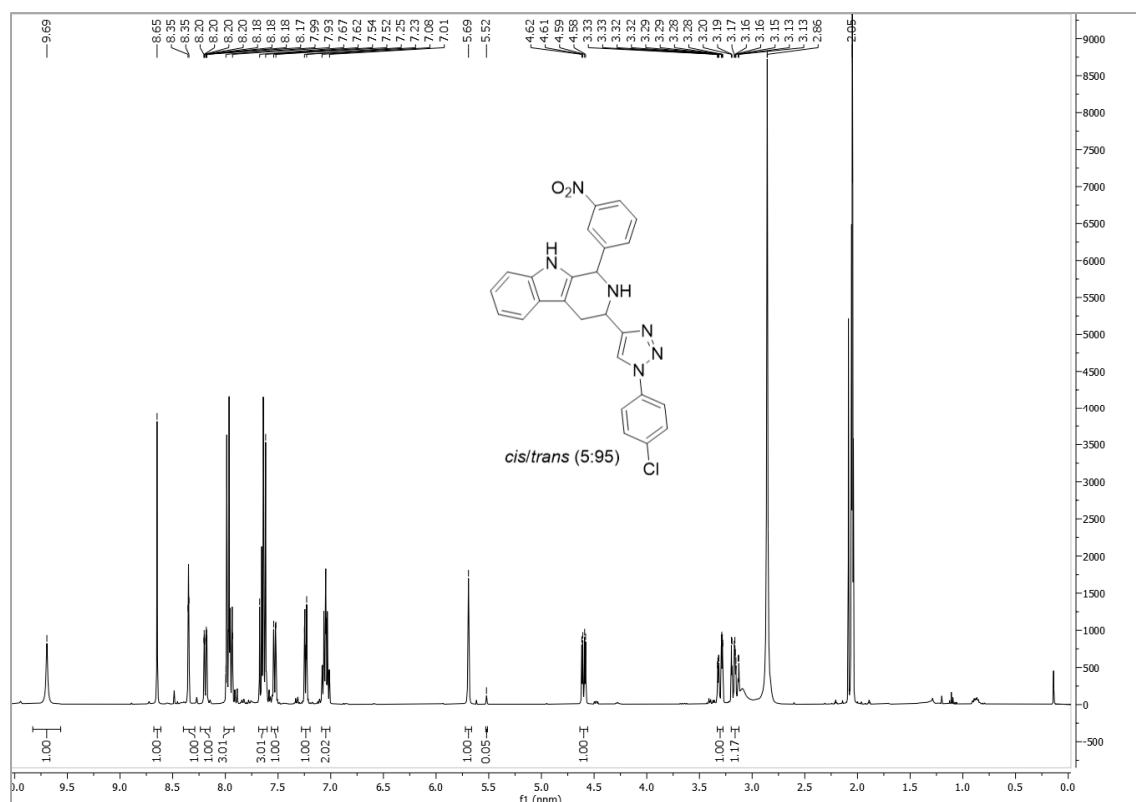

Figure S11. <sup>1</sup>H NMR spectrum of compounds **12e** (400 MHz, Acetone-*d*<sub>6</sub>).

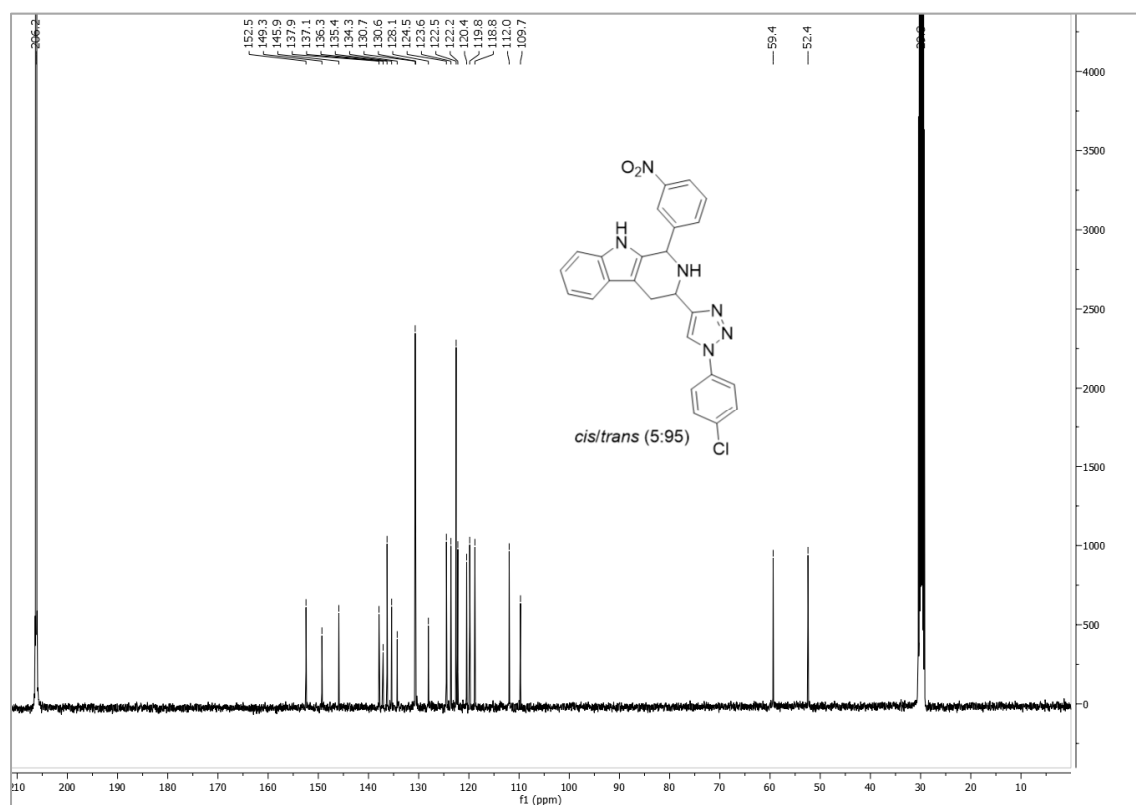

Figure S12. <sup>13</sup>C NMR spectrum of compounds **12e** (100 MHz, Acetone-*d*<sub>6</sub>).

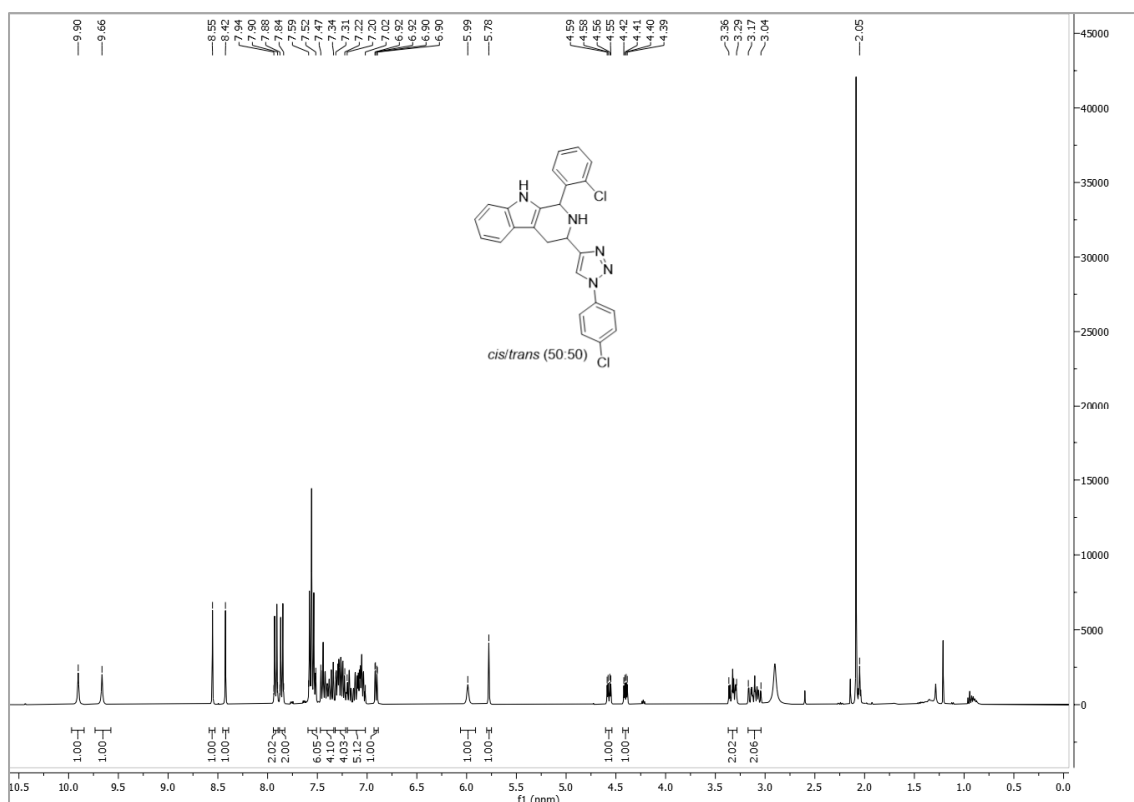

**Figure S13.** <sup>1</sup>H NMR spectrum of compounds **12f** (400 MHz, Acetone-*d*<sub>6</sub>).

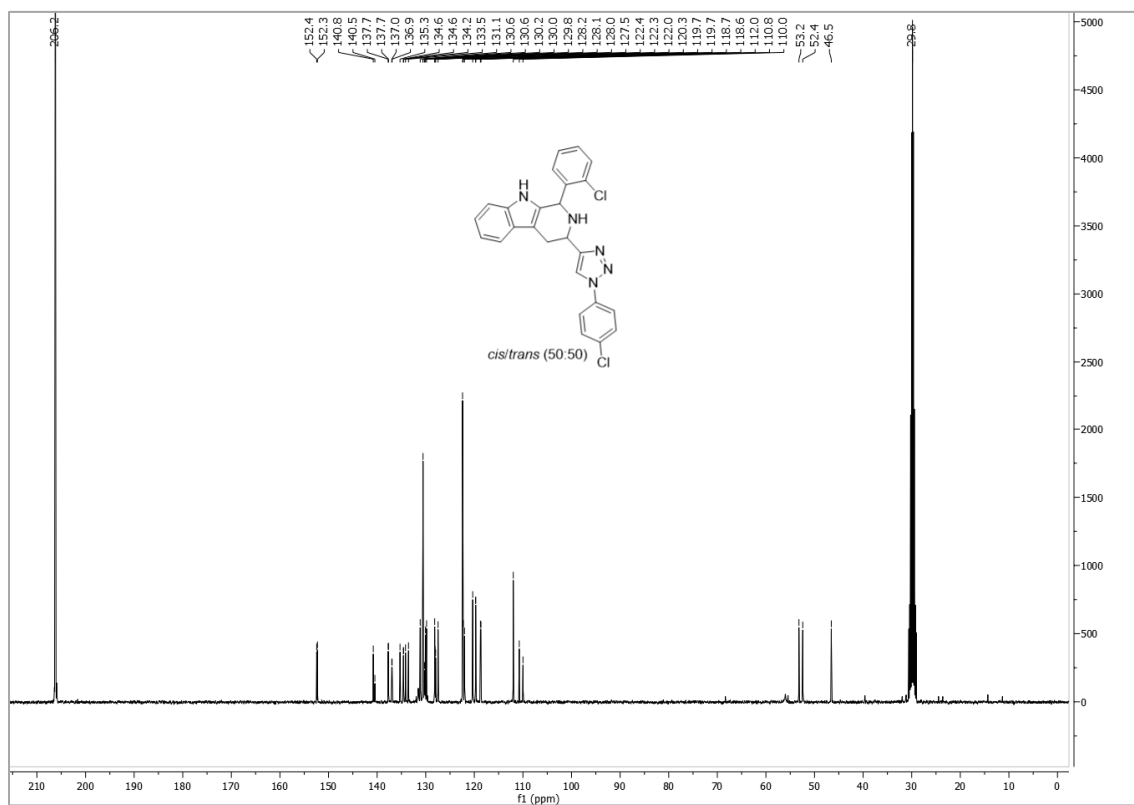

**Figure S14.** <sup>13</sup>C NMR spectrum of compounds **12f** (100 MHz, Acetone-*d*<sub>6</sub>).



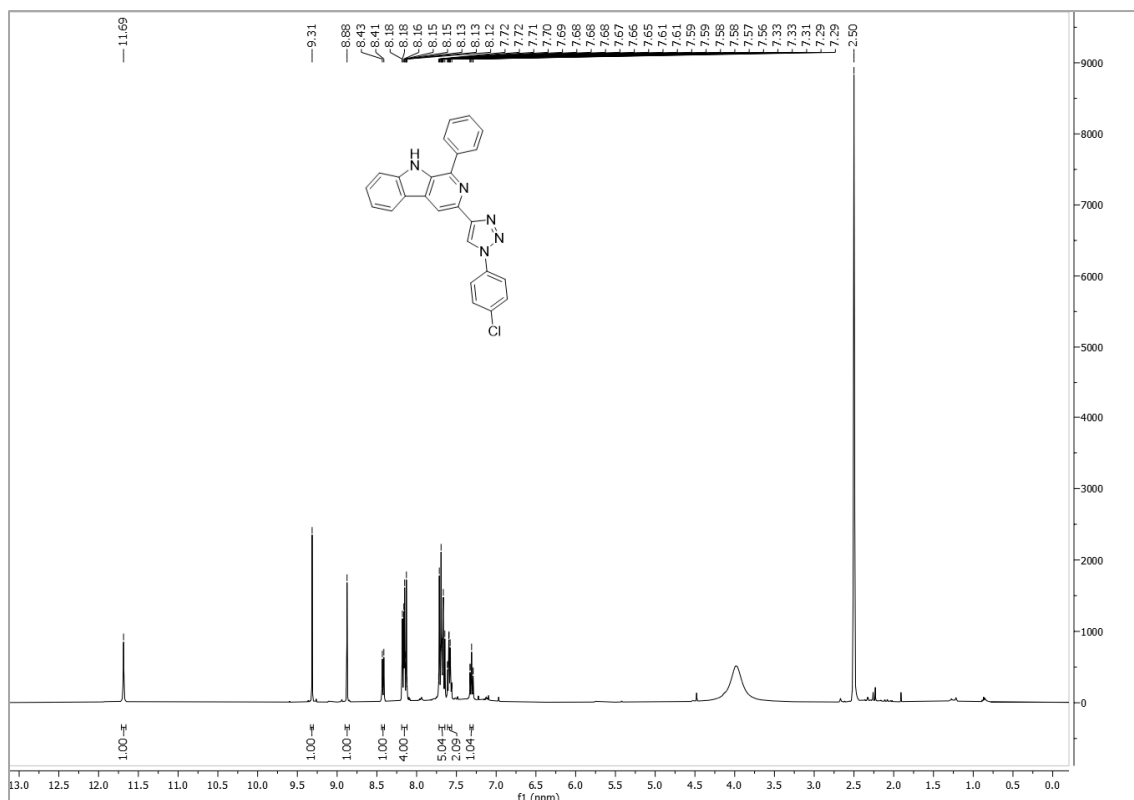

**Figure S15.** <sup>1</sup>H NMR spectrum of compounds **13a** (400 MHz, DMSO-*d*<sub>6</sub>).

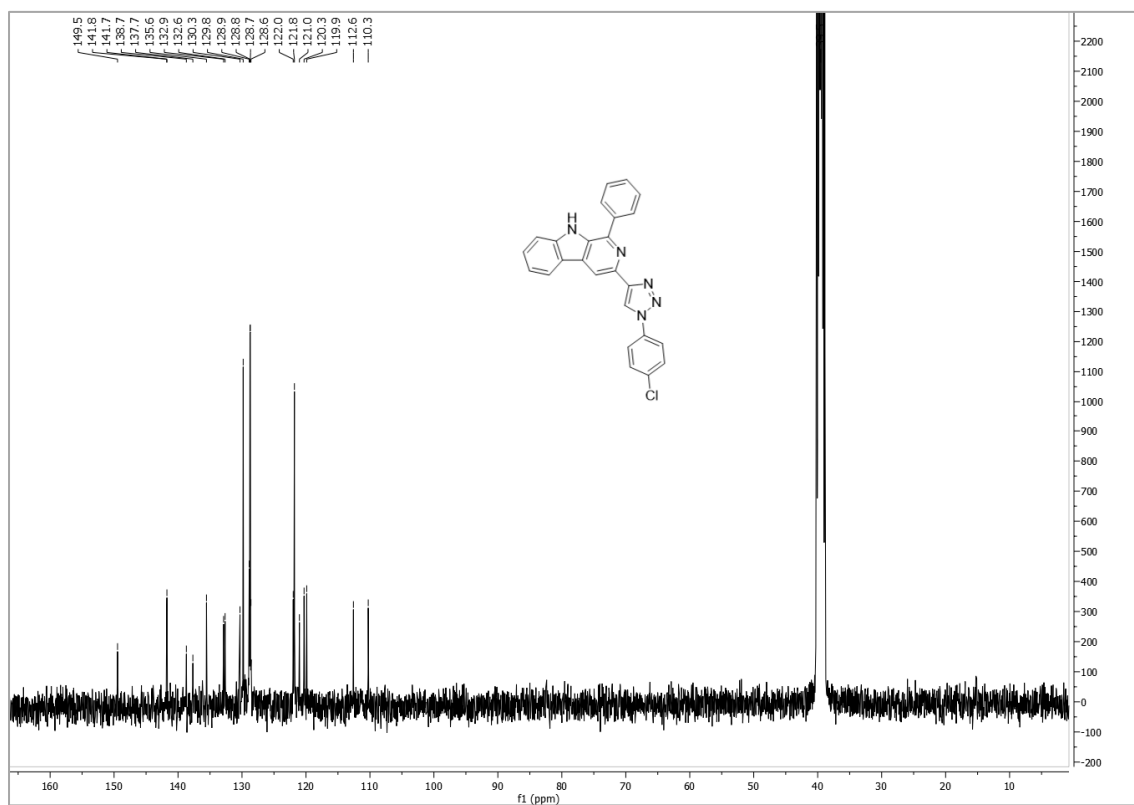

**Figure S16.** <sup>13</sup>C NMR spectrum of compounds **13a** (100 MHz, DMSO-*d*<sub>6</sub>).

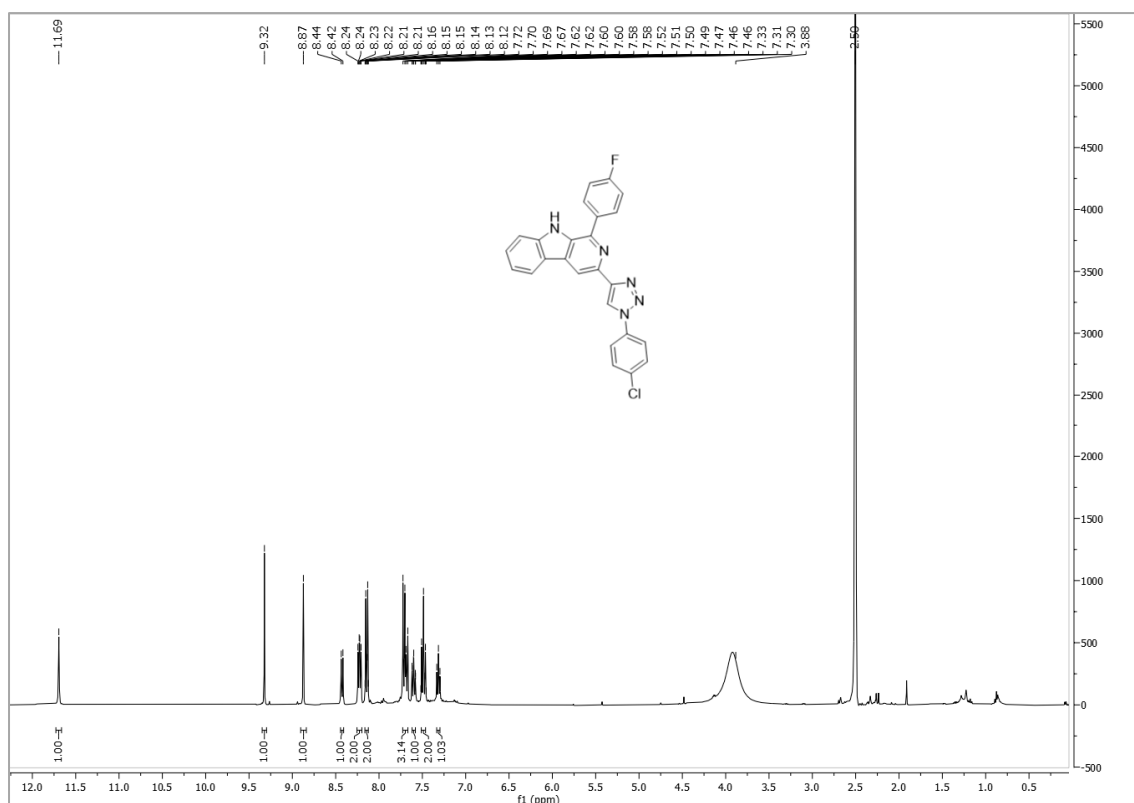

**Figure S17.** <sup>1</sup>H NMR spectrum of compounds **13b** (400 MHz, DMSO-*d*<sub>6</sub>).

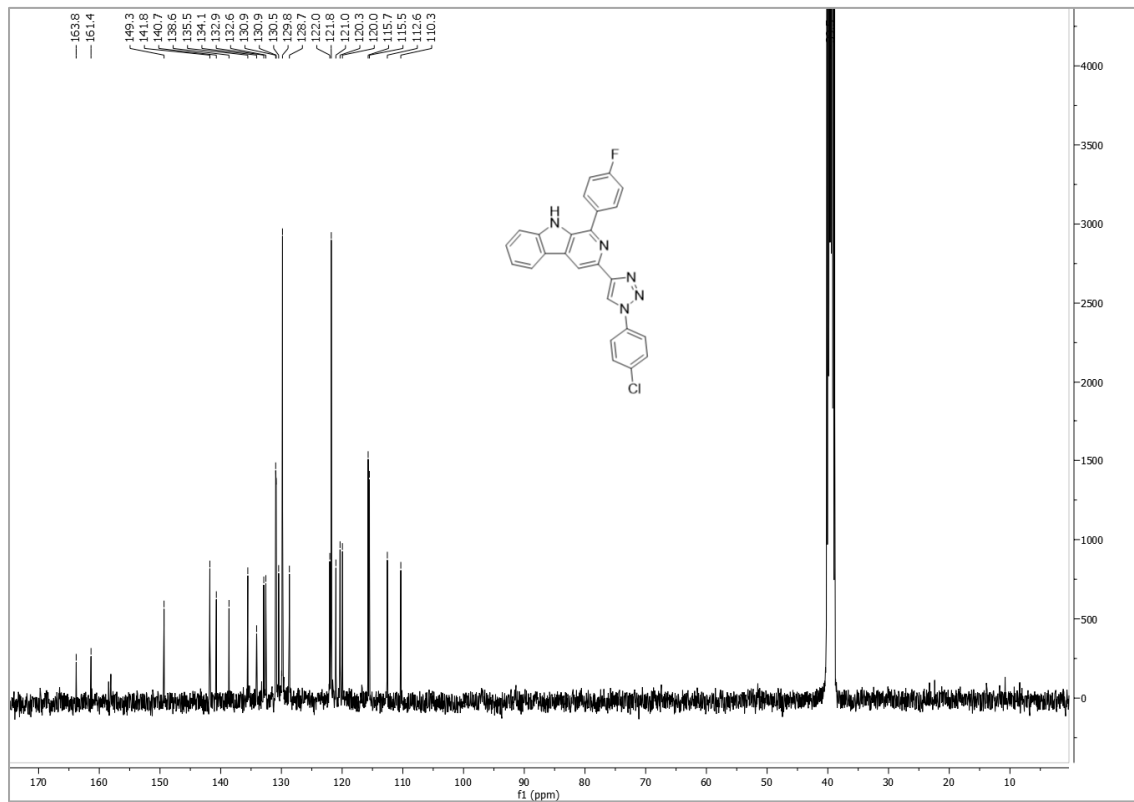

**Figure S18.** <sup>13</sup>C NMR spectrum of compounds **13b** (100 MHz, DMSO-*d*<sub>6</sub>).

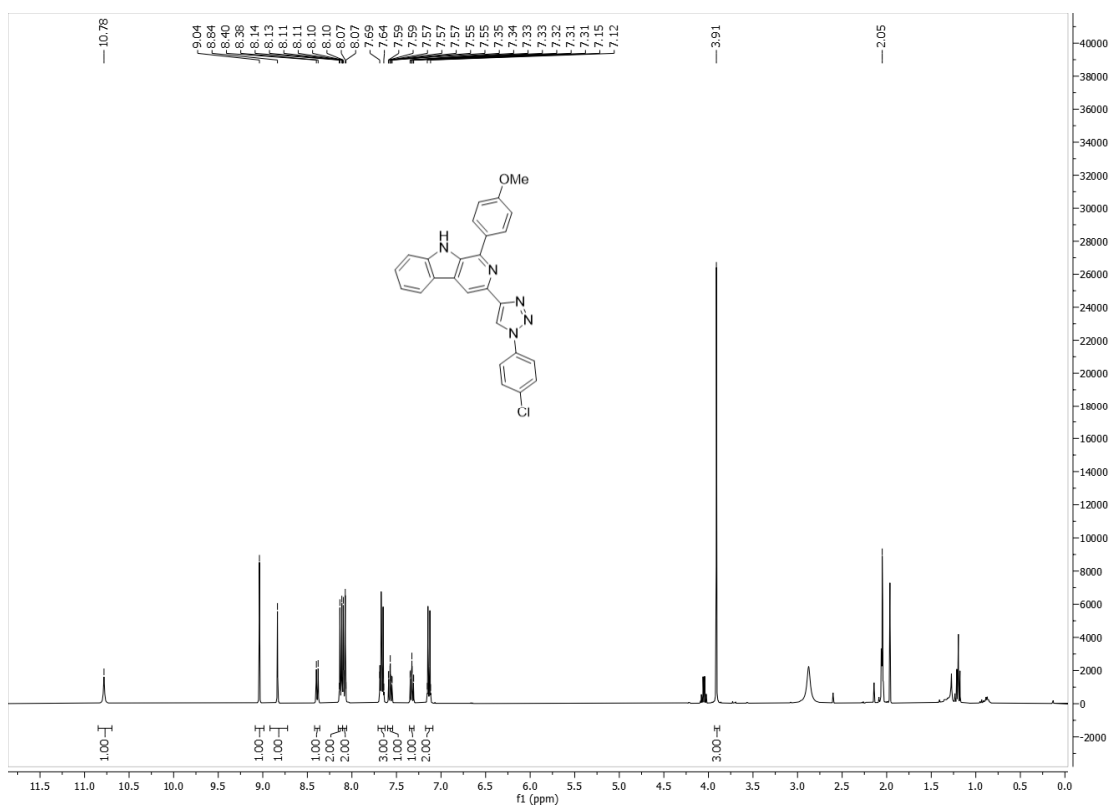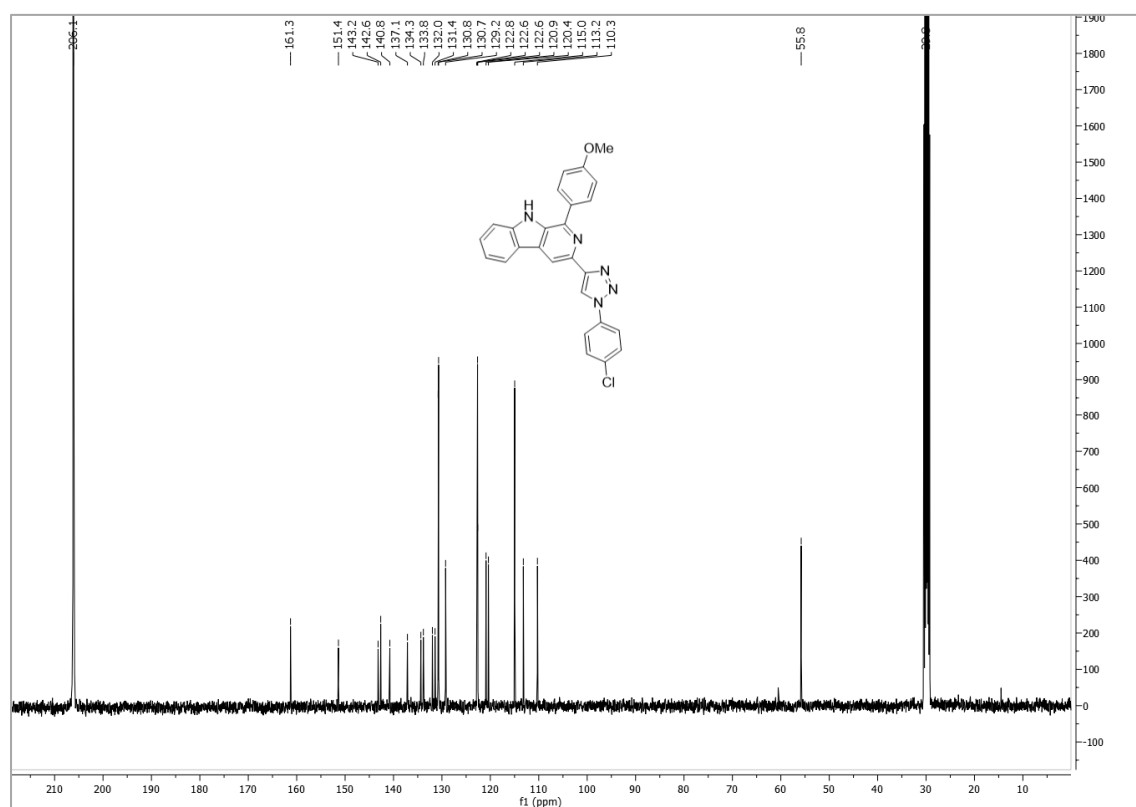

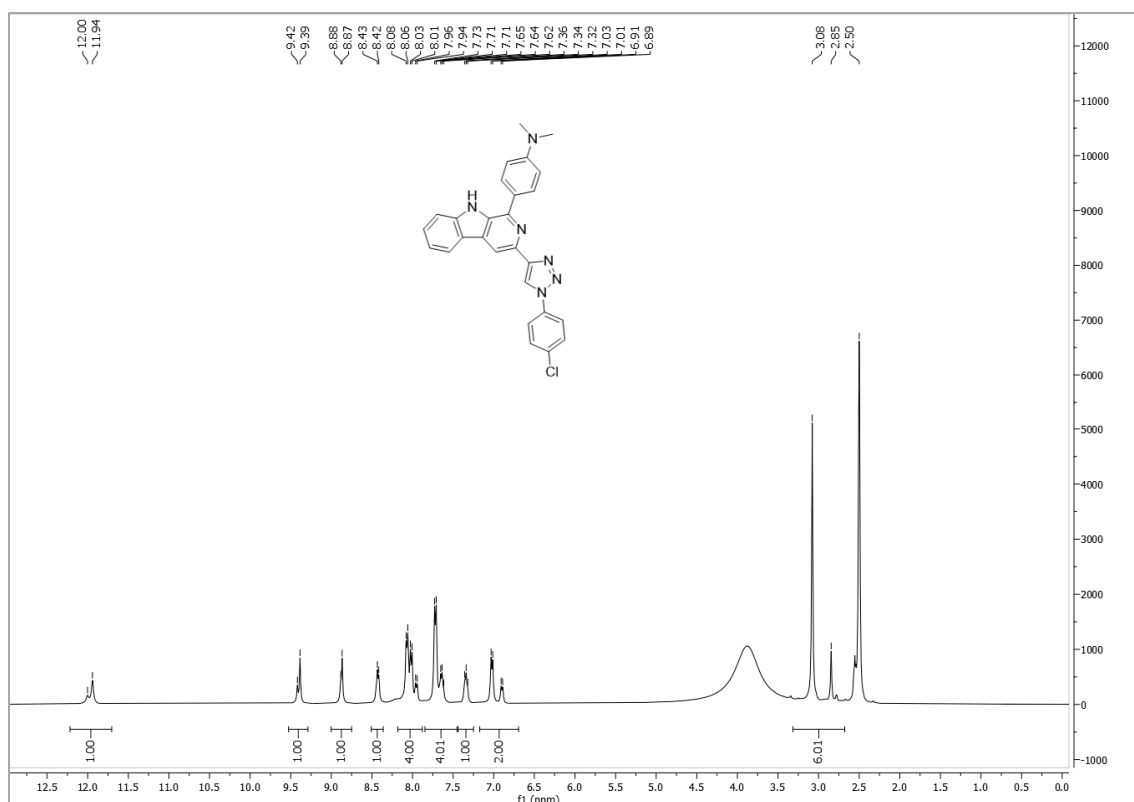

**Figure S21.** <sup>1</sup>H NMR spectrum of compounds **13d** (400 MHz, DMSO-*d*<sub>6</sub>).

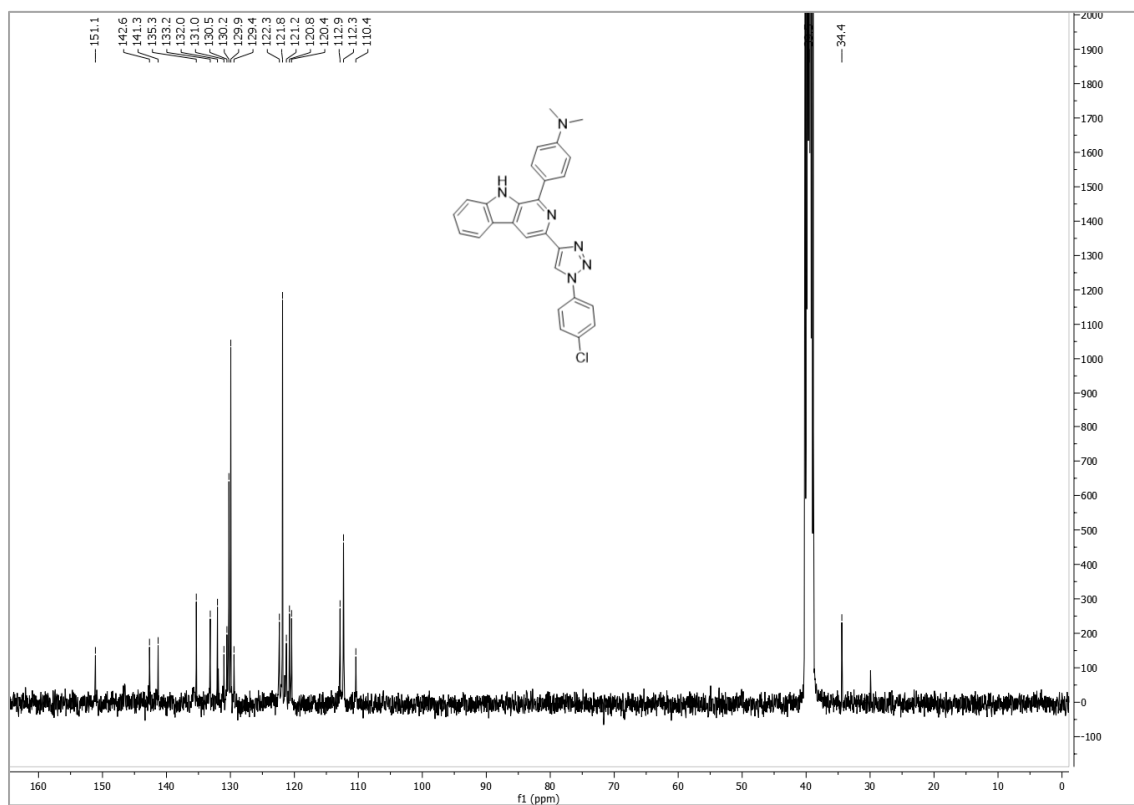

**Figure S22.** <sup>13</sup>C NMR spectrum of compounds **13d** (400 MHz, DMSO-*d*<sub>6</sub>).

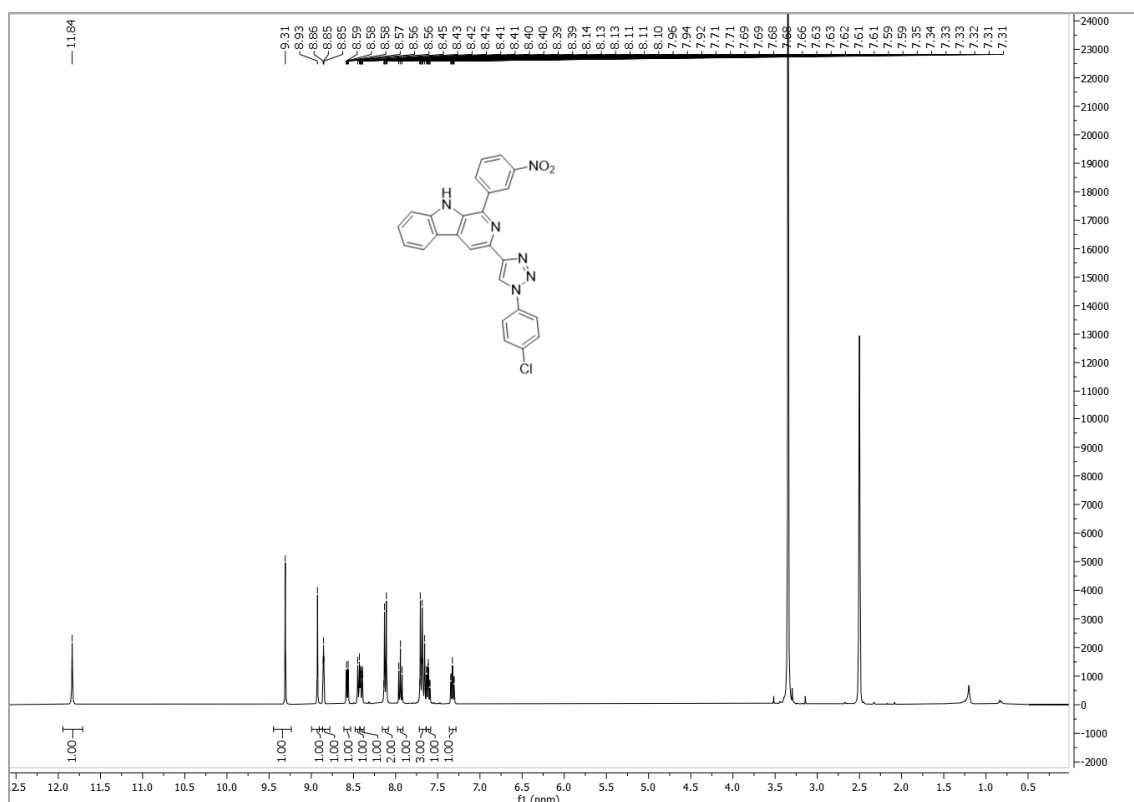

**Figure S23.** <sup>1</sup>H NMR spectrum of compounds **13e** (400 MHz, DMSO-*d*<sub>6</sub>).

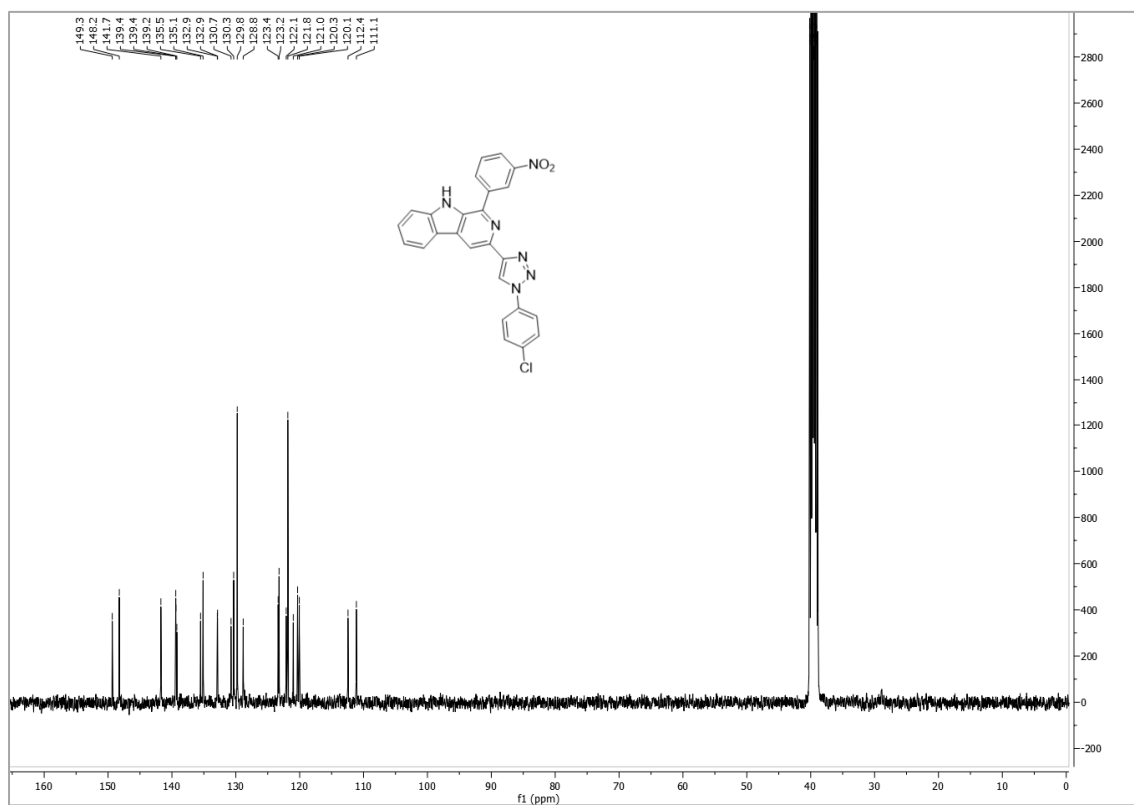

**Figure S24.** <sup>13</sup>C NMR spectrum of compounds **13e** (100 MHz, DMSO-*d*<sub>6</sub>).

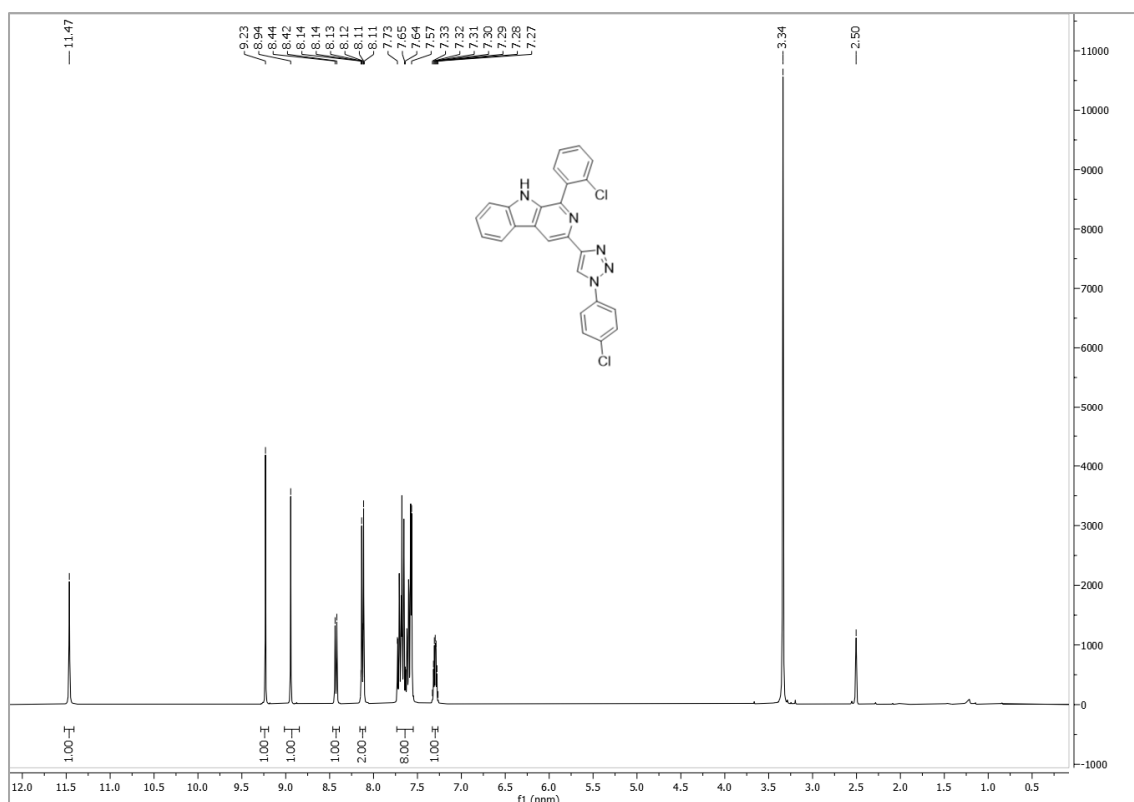

**Figure S25.** <sup>1</sup>H NMR spectrum of compounds **13f** (400 MHz, DMSO-*d*<sub>6</sub>).

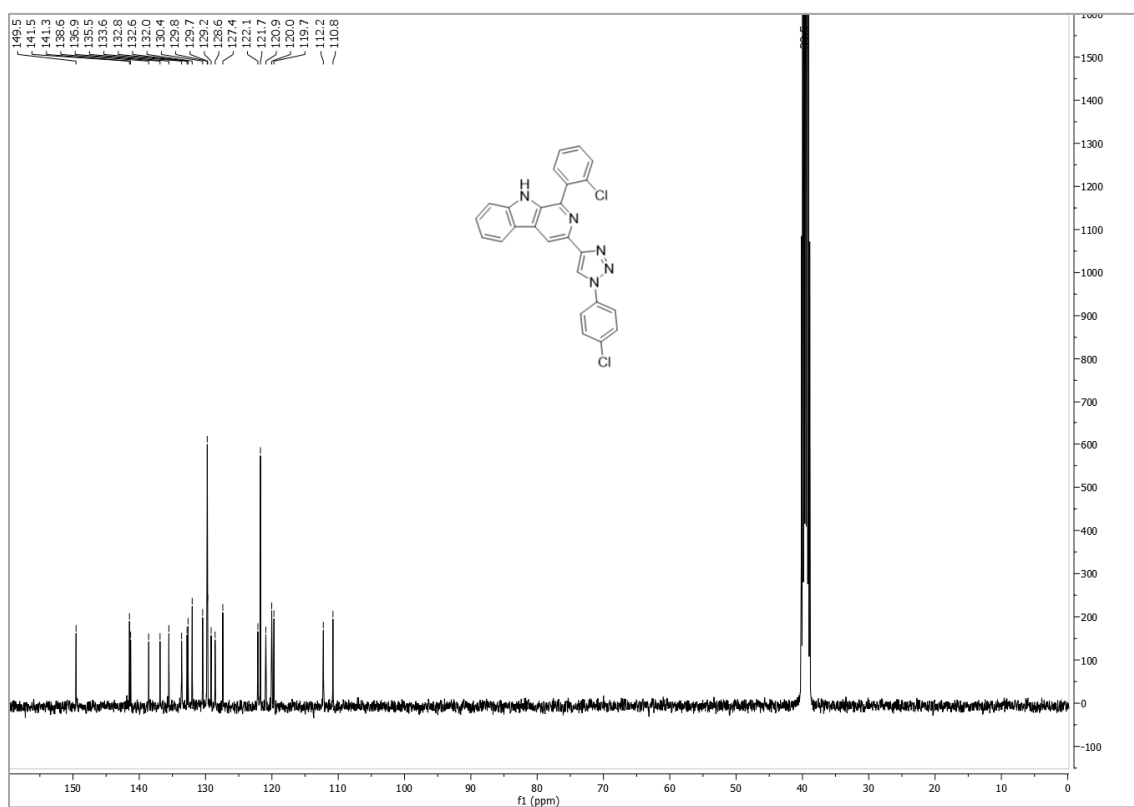

**Figure S26.** <sup>13</sup>C NMR spectrum of compounds **13f** (100 MHz, DMSO-*d*<sub>6</sub>).
